# Supplementary material
Source: publisher site journal article supplement (https://www.dovepress.com/article/302025)
Supplement: Supplementary file 1 [file get_supplementary_file.php]

Supplemental table Comparison of Basic information between the two groups (n/%)

|  |  |  |  | Origin of students | | | Grade | | |
| --- | --- | --- | --- | --- | --- | --- | --- | --- | --- |
| Group | Male | Female | Average age | From our college | Outside our college | Graduate student | Freshman year | Sophomore class | Junior class |
| Observation group (40) | 9 (22.5) | 31 (77.5) | 25.5 | 24 (60) | 13 (32.5) | 3 (7.5) | 6 (15) | 24 (60) | 10 (25) |
| Control group (40) | 11 (27.5) | 29 (72.5) | 26.3 | 23 (57.5) | 13 (32.5) | 4 (10) | 8 (20) | 23 (57.5) | 9 (22.5) |
| *P* | >0.05 | >0.05 | >0.05 | >0.05 | >0.05 | >0.05 | >0.05 | >0.05 | >0.05 |
